# Supplementary material
Source: PubMed Central journal article supplement (PMC6648720)
Supplement: ao9b00866_si_001.pdf [file ao9b00866_si_001.pdf]

## Supporting Information

### **Giant Chemical and Excellent Synergistic Raman Enhancement from Three Dimensional (3D) MoS<sub>2-x</sub>O<sub>x</sub>-Gold Nanoparticle Hybrid**

**Avijit Pramanik<sup>1</sup>, Ye Gao<sup>1</sup>, Kaelin Gates<sup>1</sup>, Salma Begum<sup>1</sup> and Paresh Chandra Ray<sup>1\*</sup>**

<sup>1</sup>Department of Chemistry and Biochemistry, Jackson State University, Jackson, MS, USA; E-mail: paresh.c.ray@jsums.edu; Fax: +16019793674

## Microscopic and Spectroscopic Characterization Data

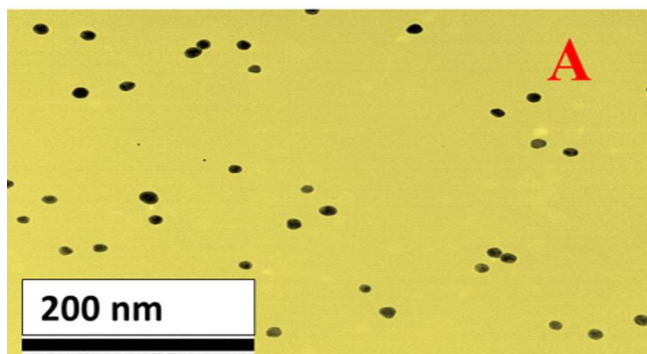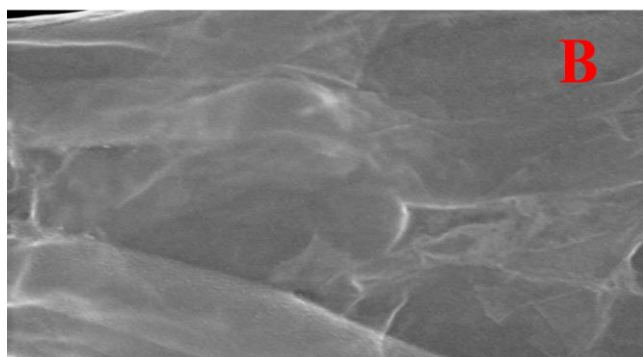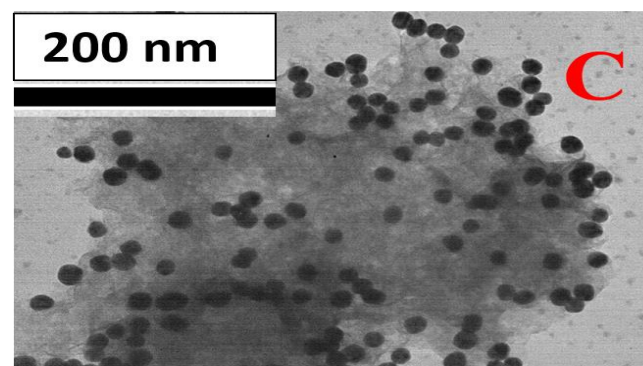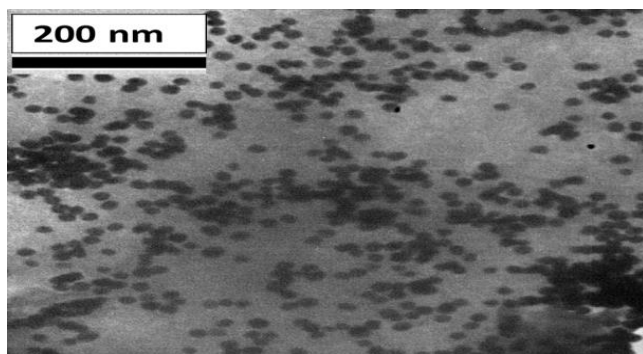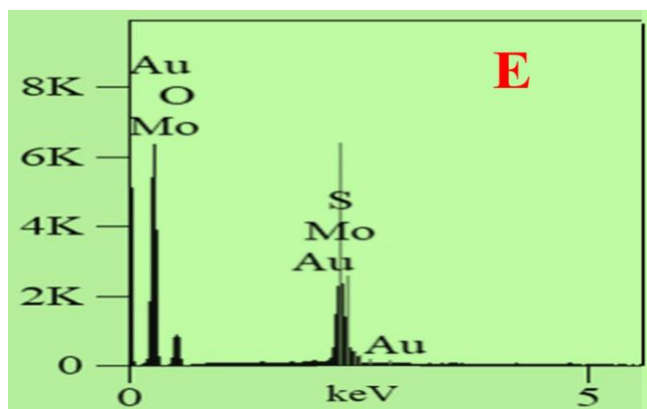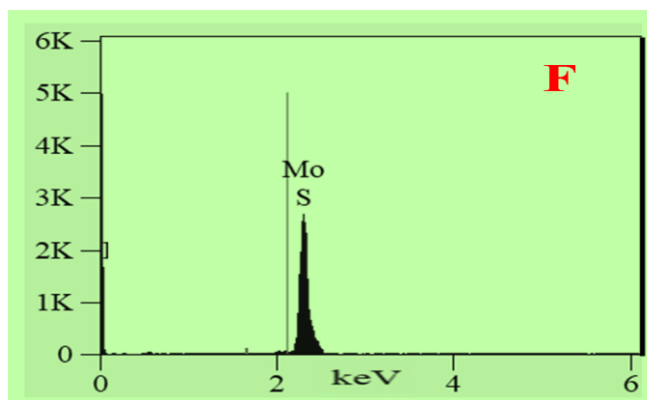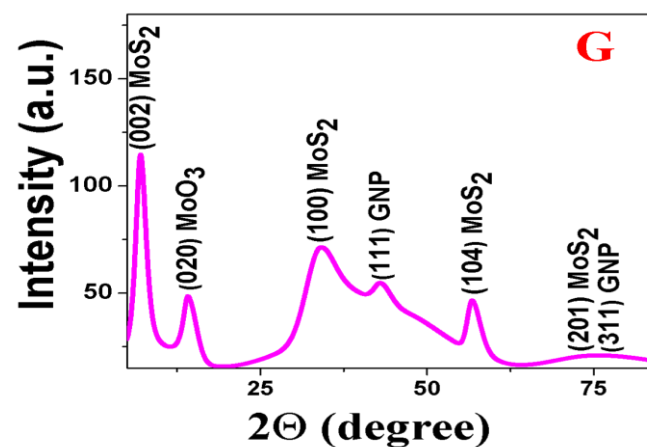

Figure S1: A) TEM image shows the morphology of GNP, B) SEM image shows the morphology of 2D  $\text{MoS}_{2-x}\text{O}_x$ , C) TEM image shows the morphology of 3D  $\text{MoS}_{2-x}\text{O}_x$ -GNP hybrid. D) TEM image shows the morphology of  $\text{MoS}_2$ -GNP hybrid. E) EDX spectra from  $\text{MoS}_{2-x}\text{O}_x$ -GNP hybrid. F) EDX spectra from  $\text{MoS}_2$ , before annealing G) XRD spectra from  $\text{MoS}_{2-x}\text{O}_x$ -GNP hybrid.

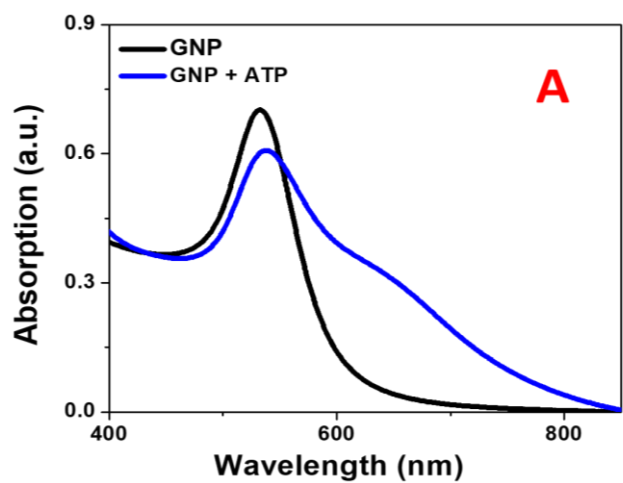

presence of 4-ATP. C) Extinction spectra from  $\text{MoS}_{2-x}\text{O}_x$ , in the presence of 4-ATP.

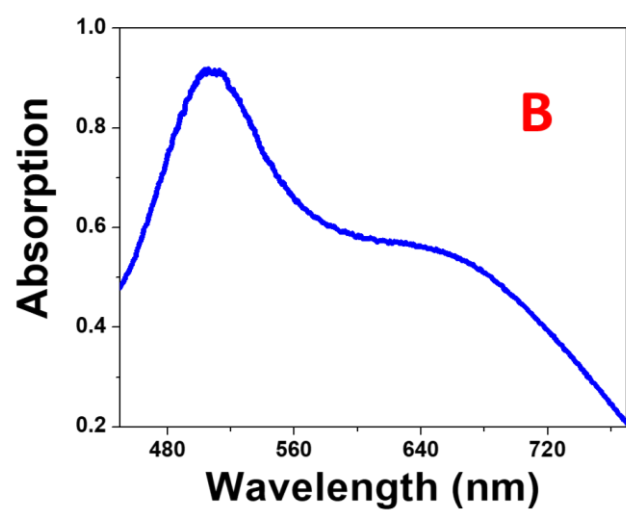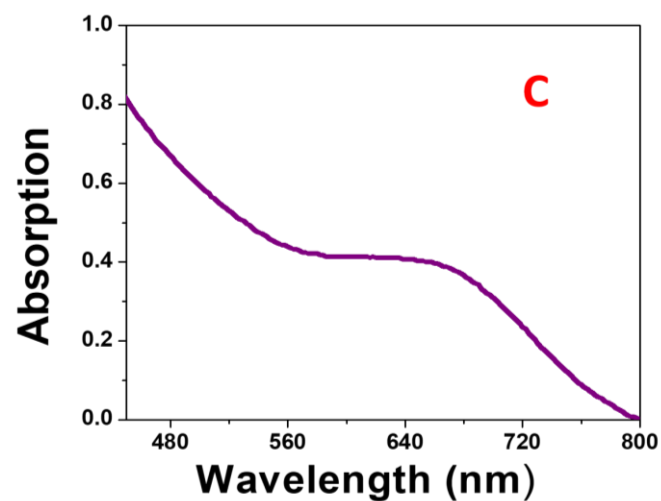

Figure S2: A) Extinction spectra from GNP in the presence and absence of 4-ATP. B) Extinction spectra from  $\text{MoS}_{2-x}\text{O}_x$ -GNP hybrid in the
